# Supplementary material
Source: PubMed Central journal article supplement (PMC8316071)
Supplement: aac.02549-20-s000s1.pdf [file aac.02549-20-s000s1.pdf]

1 **Supplementary information to:**

2 ***Physiological responses of Aspergillus niger challenged with itraconazole***

3 Jan Struckmann Poulsen<sup>a</sup>, Anne Mette Madsen<sup>b</sup>, John Kerr White<sup>a,b\*</sup>, and Jeppe Lund Nielsen<sup>a#</sup>

4

5 **Affiliation:**

6 <sup>a</sup> Department of Chemistry and Bioscience, Aalborg University, Fredrik Bajers Vej 7H, DK-9220,  
7 Aalborg East, Denmark

8 <sup>b</sup> The National Research Centre for the Working Environment, Lersø Parkallé 105, DK-2100  
9 Copenhagen East, Denmark

10

11 #Address correspondence to Jeppe Lund Nielsen, email: jln@bio.aau.dk

12 \*Present address: Department of Microbiology, Tumor and Cell Biology, Division of Clinical  
13 Microbiology, Karolinska Institute and Karolinska University Hospital, SE-17176, Stockholm, Sweden

14

15

16

17

18

19

20

21

22

23

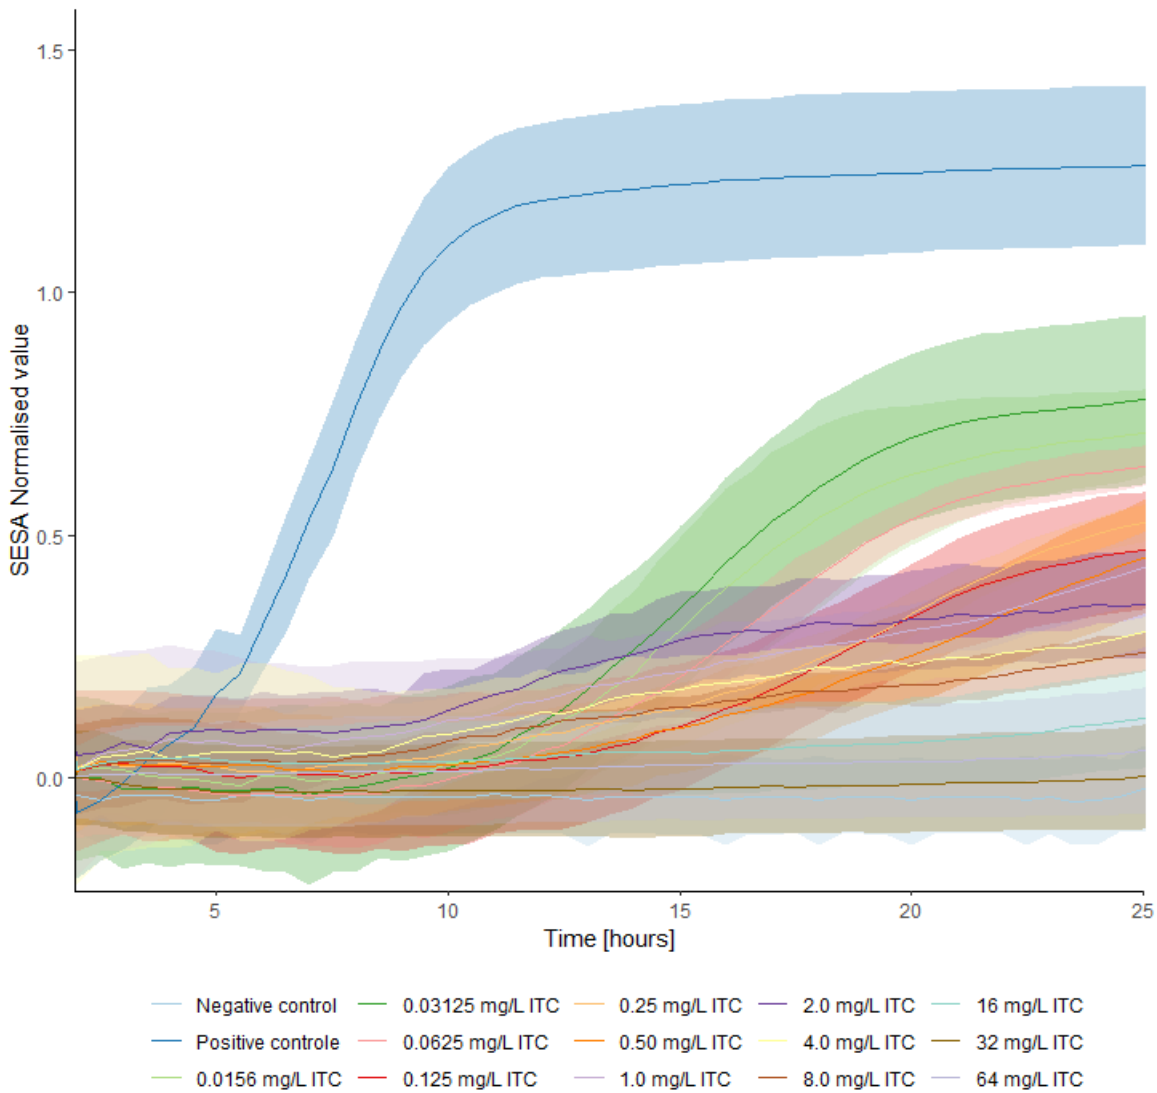

24

25 **Figure S1:** Antimicrobial susceptibility testing of *Aspergillus niger* isolate-351 subjected to  
 26 itraconazole in different concentration ranging from 0.0-64 mg·L<sup>-1</sup>. Mycelial density (SESA:  
 27 Segmentation extracted surface area) was measured using an oCelloScope for 48 hours, and here a  
 28 segment of the data is shown (3<sup>rd</sup> to 25<sup>th</sup> hour) (ITC = itraconazole).

29

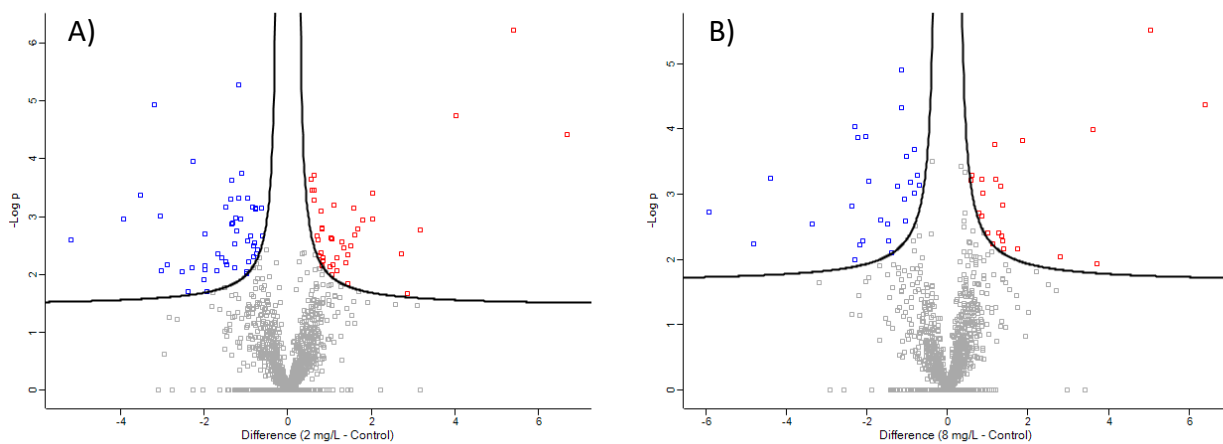

30

31 **Figure S2:** Volcano plot visualising the up- and downregulated proteins in *A. niger* cells under  
 32 antifungal stress using itraconazole. **A)** 2 mg·L<sup>-1</sup> itraconazole, **B)** 8 mg·L<sup>-1</sup> itraconazole. Proteins were  
 33 graphed by fold change (Difference) and significance (-Log p) using an FDR of 0.05 and an s0 of 0.1.  
 34 The blue squares represent the significantly downregulated proteins, while the red squares  
 35 represent the significantly upregulated proteins.

36

37 **Table S1:** Full protein lists containing identification, quantification, and functional enrichments.
